# Supplementary material for: Administration of quercetin improves mitochondria quality control and protects the neurons in 6-OHDA-lesioned Parkinson's disease models
Source: Aging (Albany NY). 2021 Apr 20;13(8):11738–51. doi: 10.18632/aging.202868 (PMC8109056; doi:10.18632/aging.202868)
Supplement: Supplementary Figures [file aging-13-202868-s001.pdf]

SUPPLEMENTARY FIGURES

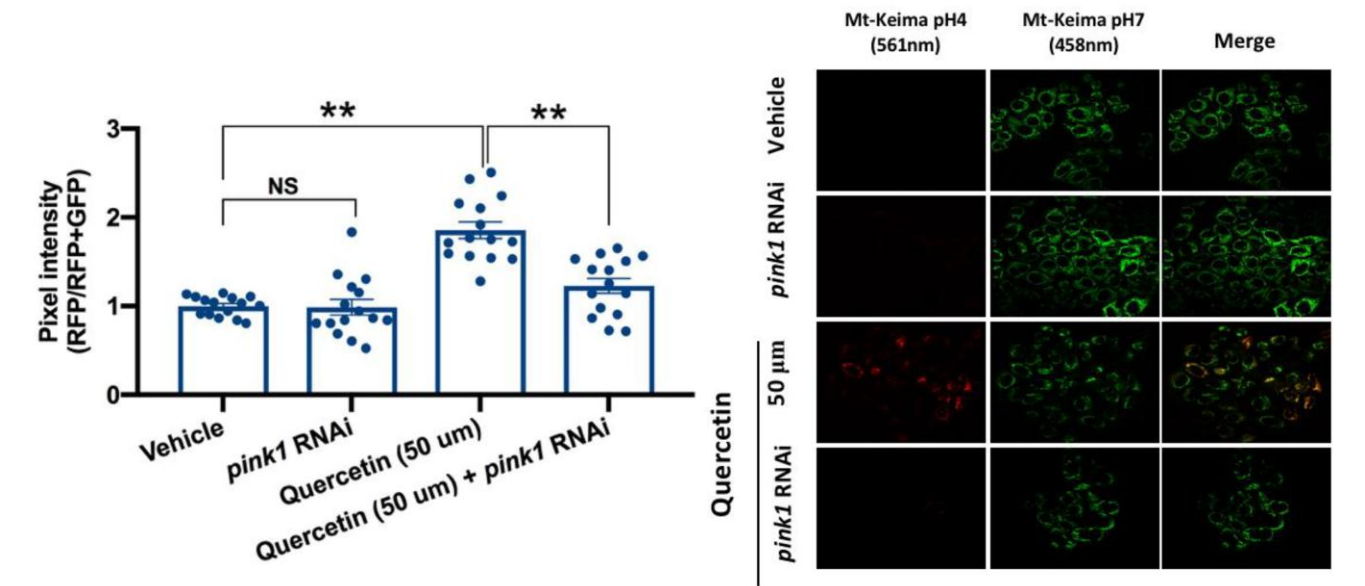

**Supplementary Figure 1.** Evaluation of mitophagy in vehicle- and quercetin (50  $\mu$ M)-treated HeLa cells expressing mt-Keima with *pink1* siRNA. Ratios indicating relative levels of mitophagy were quantified. Data are expressed as mean  $\pm$  SEM. \*\* $P$  < 0.01.

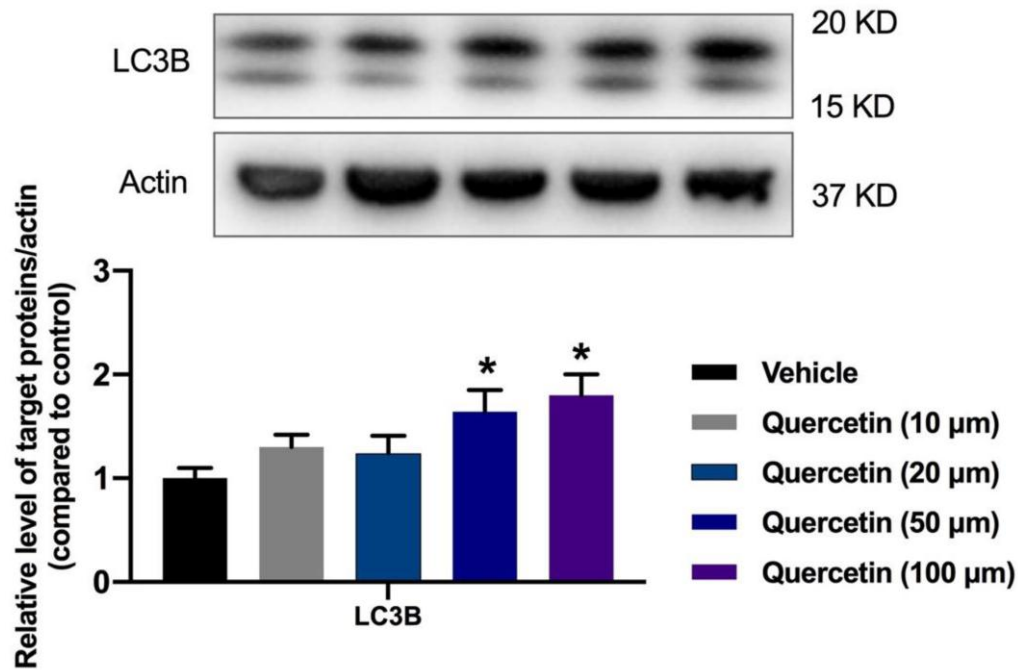

**Supplementary Figure 2.** Changes of designated mitophagy proteins in Hela cells with or without quercetin treatment. Data are expressed as mean  $\pm$  SEM. \* $P$  < 0.05 compared to the control.
